# Supplementary material
Source: publisher figshare collection journal article supplement (https://acs.figshare.com/ndownloader/files/14967197)
Supplement: Supplementary file 1 [file 14967197]

# Supporting Information for

## All-in-One “Schizophrenic” Self-assembly of Orthogonally Tuned Thermo-responsive Diblock Copolymers

*Natalya S. Vishnevetskaya,<sup>†</sup> Viet Hildebrand,<sup>‡</sup> Noverra M. Nizardo,<sup>‡,§</sup> Chia-Hsin Ko,<sup>†</sup>  
Zhenyu Di,<sup>§</sup> Aurel Radulescu,<sup>§</sup> Lester C. Barnsley,<sup>§</sup> Peter Müller-Buschbaum,<sup>†,‡</sup>,  
André Laschewsky,<sup>‡,⊥,\*</sup>, Christine M. Papadakis<sup>†,\*</sup>*

<sup>†</sup>Fachgebiet Physik weicher Materie/Lehrstuhl für Funktionelle Materialien, Physik-Department,  
Technische Universität München, James-Franck-Straße 1, 85748 Garching, Germany

<sup>‡</sup>Institut für Chemie, Universität Potsdam, Karl-Liebknecht- Straße 24-25, 14476 Potsdam-Golm,  
Germany

<sup>§</sup>Forschungszentrum Jülich GmbH, Jülich Centre for Neutron Science at MLZ, Lichtenbergstr. 1,  
85748 Garching, Germany

<sup>⊥</sup>Heinz Maier-Leibnitz Zentrum (MLZ), Lichtenbergstr. 1, 85748 Garching, Germany

<sup>⊥</sup>Fraunhofer Institut für Angewandte Polymerforschung, Geiselbergstr. 69,  
14476 Potsdam-Golm, Germany

<sup>§</sup>Permanent address N.M.N.: Department of Chemistry, University of Indonesia,  
Kampus UI Depok, Depok 16424, West-Java, Indonesia

**14 pages, 4 figures and 5 tables.**

## Photographs of solutions

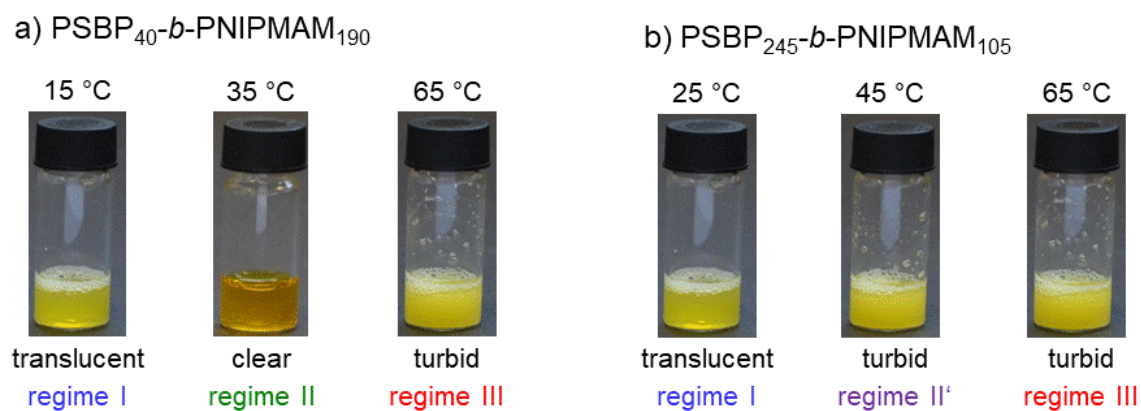

**Figure S1.** Photographs of 50 g L<sup>-1</sup> solutions of (a) PSBP<sub>40</sub>-*b*-PNIPMAM<sub>190</sub> in H<sub>2</sub>O, showing a dissolved intermediate regime II, and of (b) PSBP<sub>245</sub>-*b*-PNIPMAM<sub>105</sub>, showing an insoluble intermediate regime II'.

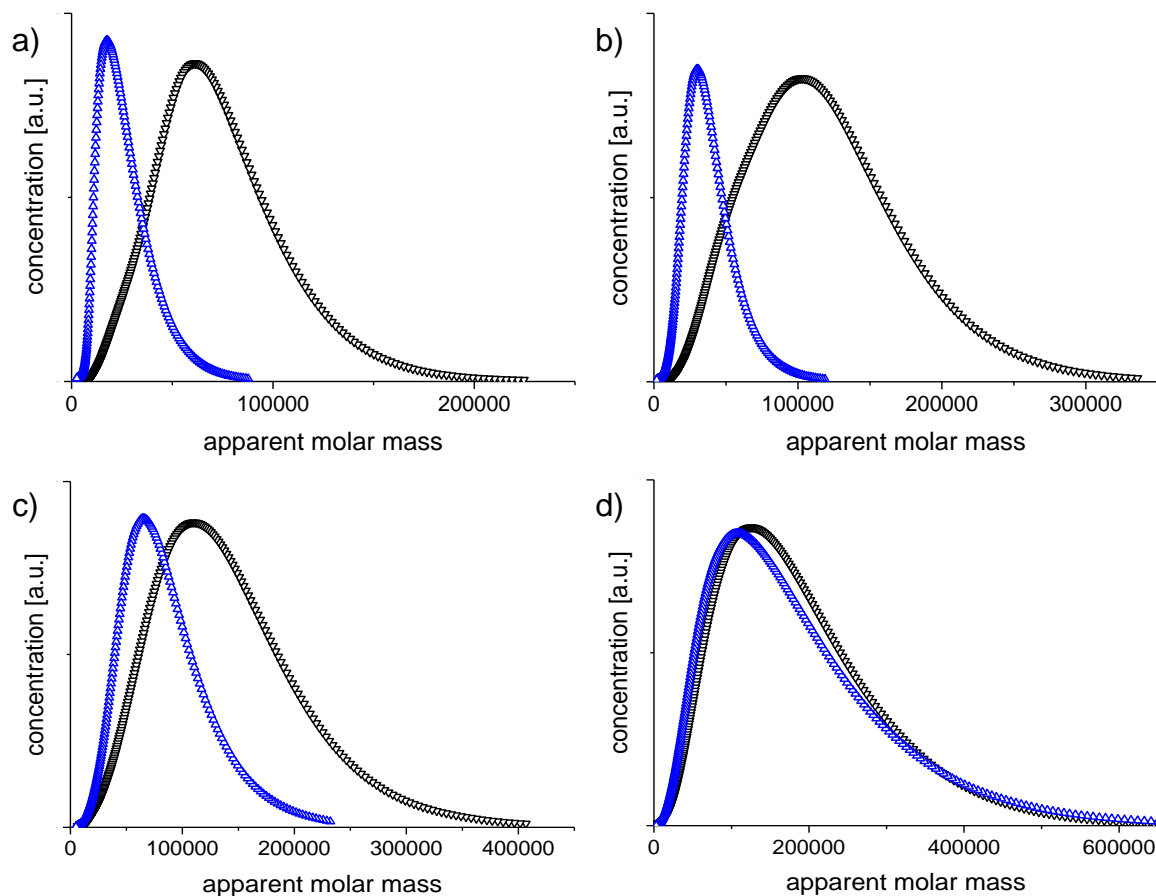

**Figure S2.** SEC elugrams of macro RAFT agents PSBP<sub>x</sub> (blue  $\Delta$ ), and of the derived block copolymers PSBP<sub>x</sub>-*b*-PNIPMAM<sub>y</sub> (black  $\nabla$ ): (a) PSBP<sub>40</sub> and PSBP<sub>40</sub>-*b*-PNIPMAM<sub>190</sub>; (b) PSBP<sub>50</sub> and PSBP<sub>50</sub>-*b*-PNIPMAM<sub>155</sub>; (c) PSBP<sub>245</sub> and PSBP<sub>245</sub>-*b*-PNIPMAM<sub>105</sub>; (d) PSBP<sub>425</sub> and PSBP<sub>425</sub>-*b*-PNIPMAM<sub>110</sub>.

Conditions: eluent hexafluoroisopropanol (HFIP) containing 50 mM CF<sub>3</sub>COONa, 40 °C, calibration with narrowly distributed poly(methyl methacrylate) standards 500 - 520,000 D.

### Models used for fitting the SANS data

The SANS data were analyzed by fitting the following function:

$$I(q) = I_0 P(q) S(q) + I_{agg}(q) + I_{fluct}(q) + I_{bg} \quad (S1)$$

$I_{bg}$  denotes the constant background, which was in all cases fixed at 0.45-0.6 cm<sup>-1</sup>,  $I_0$  a scaling factor and  $P(q)$  the micellar form factor.

For  $P(q)$ , the form factor of polydisperse, homogeneous spheres was used with a Schulz distribution for the radii:<sup>1</sup>

$$P_{sphere}(q) = \left(\frac{4\pi}{3}\right)^2 N_0 (\Delta\rho)^2 \int_0^\infty f(r) r^6 F^2(q) dr \quad (S2)$$

where  $N_0$  is the total number of particles per unit volume.  $\Delta\rho$  is the difference in scattering length density of the sphere and the solvent:  $\Delta\rho = \rho_{sphere} - \rho_{solvent}$  (values used see below).  $f(r)$  is the normalized Schulz distribution:<sup>2</sup>

$$f(r) = (z+1)^{z+1} u^z \frac{\exp[-(z+1)u]}{r_{avg} \Gamma(z+1)} \quad (S3)$$

$u = r/r_{avg}$ , where  $r_{avg}$  denotes the average radius,  $\Gamma(n)$  is the Gamma function, and  $z$  is related to the polydispersity  $p$  by  $z = 1/(p^2-1)$ :  $p = \sigma/r_{avg}$ , where  $\sigma^2$  is the variance of the distribution.  $F(q)$  is the scattering amplitude of a sphere having a radius  $r$ :

$$F(q) = \frac{3[\sin(qr) - qr \cos(qr)]}{(qr)^3} \quad (S4)$$

For the structure factor  $S(q)$ , we used the Percus-Yevick hard-sphere structure factor:<sup>3</sup>

$$S(q) = \frac{1}{1 + 24\eta G(2R_{HS}q)/2R_{HS}q} \quad (S5)$$

where  $R_{HS}$  is the hard-sphere radius, i.e. half the center-to-center distance between the particles.  $\eta$  is the hard sphere volume fraction, i.e. the fraction of micelles which are correlated, and

$$G(x) = \gamma \frac{\sin x - x \cos x}{x^2} + \delta \frac{2x \sin x + (2-x^2) \cos x - 2}{x^3} + \varepsilon \frac{-x^4 \cos x + 4[3x^2 - 6 \cos x + (x^3 - 6x) \sin x + 6]}{x^5} \quad (S6)$$

where  $\gamma = (1+2\eta)^2/(1-\eta)^4$ ,  $\delta = -6\eta(1+\eta/2)^2/(1-\eta)^4$  and  $\varepsilon = \gamma\eta/2$ .

For PSBP<sub>50</sub>-*b*-PNIPMAM<sub>155</sub> at 40 °C and for PSBP<sub>245</sub>-*b*-PNIPMAM<sub>105</sub> at 20-50 °C, no structure factor was necessary, and  $S(q)$  was set to unity.

$I_{agg}(q)$  denotes the scattering from large aggregates. We used the Porod form factor:<sup>4</sup>

$$I_{agg}(q) = \frac{I_P}{q^\alpha} \quad (S7)$$

which comprises its amplitude  $I_P$  and the Porod exponent  $\alpha$ .  $\alpha$  is characteristic of the surface roughness of the aggregates: for particles with a smooth surface,  $\alpha = 4$ ; for rough surfaces,  $\alpha < 4$ , and for a concentration gradient near the aggregate surface,  $\alpha > 4$ .<sup>5</sup> This term was not needed for PSBP<sub>245</sub>-*b*-PNIPMAM<sub>105</sub> at 90 °C.

$I_{fluct}(q)$  describes concentration fluctuations. We used the Ornstein-Zernike term to model the scattering from concentration fluctuations in solutions of non-charged polymers:<sup>6</sup>

$$I_{OZ}(q) = \frac{I_{OZ}}{1+q^2\xi^2} \quad (S8)$$

which comprises an amplitude  $I_{OZ}$  and a correlation length,  $\xi_{OZ}$ . For PSBP<sub>50</sub>-*b*-PNIPMAM<sub>155</sub> at 50-60 °C and for PSBP<sub>245</sub>-*b*-PNIPMAM<sub>105</sub> in 24 mM NaBr in D<sub>2</sub>O at 55 °C, instead of the Ornstein-Zernike term, the solvation term,  $I_{solv}(q)$ , was used:

$$I_{solv}(q) = CF_{solv}(q) \quad (S9)$$

The parameter  $C$  characterizes the solvation intensity, which reads:

$$C = A \frac{k_B T (\Delta\rho)^2}{K}, \quad (S10)$$

where  $A$  is a scaling factor related to the volume fraction,  $K$  is the osmotic compressibility,  $(\Delta\rho)^2$  is the contrast factor with  $\rho$  being the scattering length densities of the polymers and the solvent,  $k_B$  is Boltzmann's constant and  $T$  the absolute temperature.  $F_{solv}(x)$  is the scaling function, which is given by:

$$F_{solv}(q) = \frac{1}{1+(|q-q_0|\xi_{solv})^m}. \quad (S11)$$

$I_{solv}(q)$  was previously used to model concentration fluctuations in semidilute solutions of polyelectrolytes.<sup>7</sup> It features the parameter  $C$  characterizing the solvation intensity and the correlation length  $\xi_{solv}$ . The average distance  $d_0 = 2\pi/q_0$  between the charged domains is calculated from the position of maximum intensity,  $q_0$ . For non-charged polymers, the solvation Porod exponent  $m$  is 5/3 in a good solvent or 2 in a theta solvent, respectively.<sup>8</sup>

The scattering length densities (SLD) of PSBP, PNIPMAM and D<sub>2</sub>O were calculated at  $7.3 \times 10^{-5} \text{ nm}^{-2}$ ,  $6.8 \times 10^{-5} \text{ nm}^{-2}$ , and  $6.3 \times 10^{-4} \text{ nm}^{-2}$ , assuming mass densities of  $1.0 \text{ g cm}^{-3}$  for PSBP and  $1.1 \text{ g cm}^{-3}$  for PNIPMAM. In all fits of Eq. 1, the SLD values of the particles in regimes I and III were fixed at  $7.1 \times 10^{-5} \text{ nm}^{-2}$ .

For the solution of PSBP<sub>50</sub>-*b*-PNIPMAM<sub>155</sub> at 30 and 40 °C as well as the one of PSBP<sub>245</sub>-*b*-PNIPMAM<sub>105</sub> at 40 °C, the curves were additionally modelled by:

$$I(q) = I_{agg}(q) + I_{solv}(q) + I_{bg} \quad (\text{S12})$$

Modeling was performed using the SANS Data Reduction and Analysis software provided by the NIST Center for Neutron Research within the IGOR Pro software environment.<sup>9</sup>

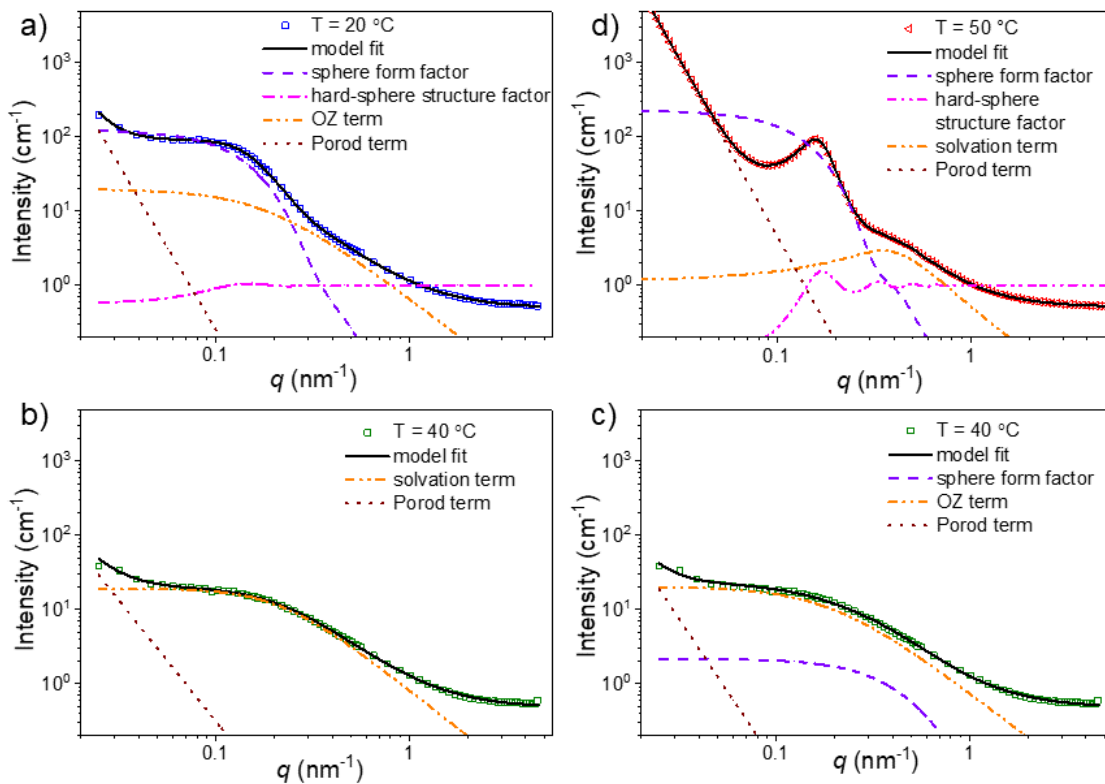

**Figure S3.** Details of model fitting to the SANS data of the 50 g L<sup>-1</sup> PSBP<sub>50</sub>-*b*-PNIPMAM<sub>155</sub> solution in salt-free D<sub>2</sub>O in the 3 regimes (I: 20 °C, II: 40 °C, III: 50 °C), temperatures are given in the graphs. Symbols: data points, only every second point is shown. Full lines: Fits of Eq. 1 (a,c,d) and of Eq. 2(b). Broken lines: Contributions to the fits as described in the legends. OZ stands for Ornstein-Zernike.

**Table S1.** Best fit parameters of Eq. 1 for the SANS data of a 50 g L<sup>-1</sup> PSBP<sub>50</sub>-*b*-PNIPMAM<sub>155</sub> solution in salt-free D<sub>2</sub>O in regimes I, II and III.

|                                    | Regime I                       |             | Regime II   | Regime III  |             |
|------------------------------------|--------------------------------|-------------|-------------|-------------|-------------|
|                                    | 20 °C                          | 30 °C       | 40 °C       | 50 °C       | 60 °C       |
| $r_{avg}$ [nm]                     | 11.1 ± 1.0                     | 10.7 ± 1.1  | 1.7 ± 0.2   | 12.6 ± 0.1  | 12.9 ± 0.1  |
| $p$                                | 0.26 ± 0.03                    | 0.23 ± 0.02 | 0.59 ± 0.05 | 0.20 ± 0.01 | 0.13 ± 0.01 |
| $R_{HS}$ [nm]                      | 20 ± 2                         | 19 ± 2      |             | 18.8 ± 0.1  | 17.9 ± 0.1  |
| $\eta$                             | 0.07 ± 0.01                    | 0.08 ± 0.01 |             | 0.31 ± 0.02 | 0.32 ± 0.03 |
| $I_P \times 10^9$                  | 3.5 ± 0.3                      | 0.6 ± 0.1   | 0.8 ± 0.1   | 1.8 ± 0.1   | 0.62 ± 0.01 |
| $\alpha$                           | 4.4 ± 0.2                      | 3.9 ± 0.2   | 3.6 ± 0.2   | 4.7 ± 0.1   | 4.9 ± 0.1   |
| $I_{OZ}$ [cm <sup>-1</sup> ]       | 20 ± 2                         | 33 ± 3      | 20 ± 2      |             |             |
| $\xi_{OZ}$ [nm]                    | 5.4 ± 0.5                      | 6.5 ± 0.6   | 5.1 ± 0.4   |             |             |
| $C$ [cm <sup>-1</sup> ]            |                                |             |             | 3.0 ± 0.1   | 0.9 ± 0.1   |
| $\xi_{solv}$ [nm]                  |                                |             |             | 3.8 ± 0.1   | 6.3 ± 0.1   |
| $m$                                |                                |             |             | 1.7 ± 0.1   | 1.0 ± 0.1   |
| $d_0$ [nm]                         |                                |             |             | 17.9 ± 0.3  | 11.1 ± 1    |
| $SLD_{sphere}$ [nm <sup>-2</sup> ] | $(7.1 \pm 0.3) \times 10^{-5}$ |             |             |             |             |



**Table S2.** Best fit parameters of Eq. 2 for the SANS data of a 50 g L<sup>-1</sup> PSBP<sub>50</sub>-*b*-PNIPMAM<sub>155</sub> solution in salt-free D<sub>2</sub>O in regime I at 30 °C and regime II.

|                              | <b>Regime I</b><br><b>30 °C</b> | <b>Regime II</b><br><b>40 °C</b> |
|------------------------------|---------------------------------|----------------------------------|
| <i>I<sub>p</sub></i>         | $(1.4 \pm 0.1) \times 10^{-8}$  | $(9.7 \pm 0.8) \times 10^{-8}$   |
| <i>α</i>                     | $3.8 \pm 0.2$                   | $3.3 \pm 0.2$                    |
| <i>C</i> [cm <sup>-1</sup> ] | $42 \pm 4$                      | $19 \pm 2$                       |
| <i>ξ<sub>solv</sub></i> [nm] | $9.9 \pm 0.3$                   | $4.8 \pm 0.2$                    |
| <i>m</i>                     | $1.82 \pm 0.02$                 | $2.01 \pm 0.02$                  |
| <i>d<sub>0</sub></i> [nm]    | $8 \pm 1$                       | $15 \pm 2$                       |

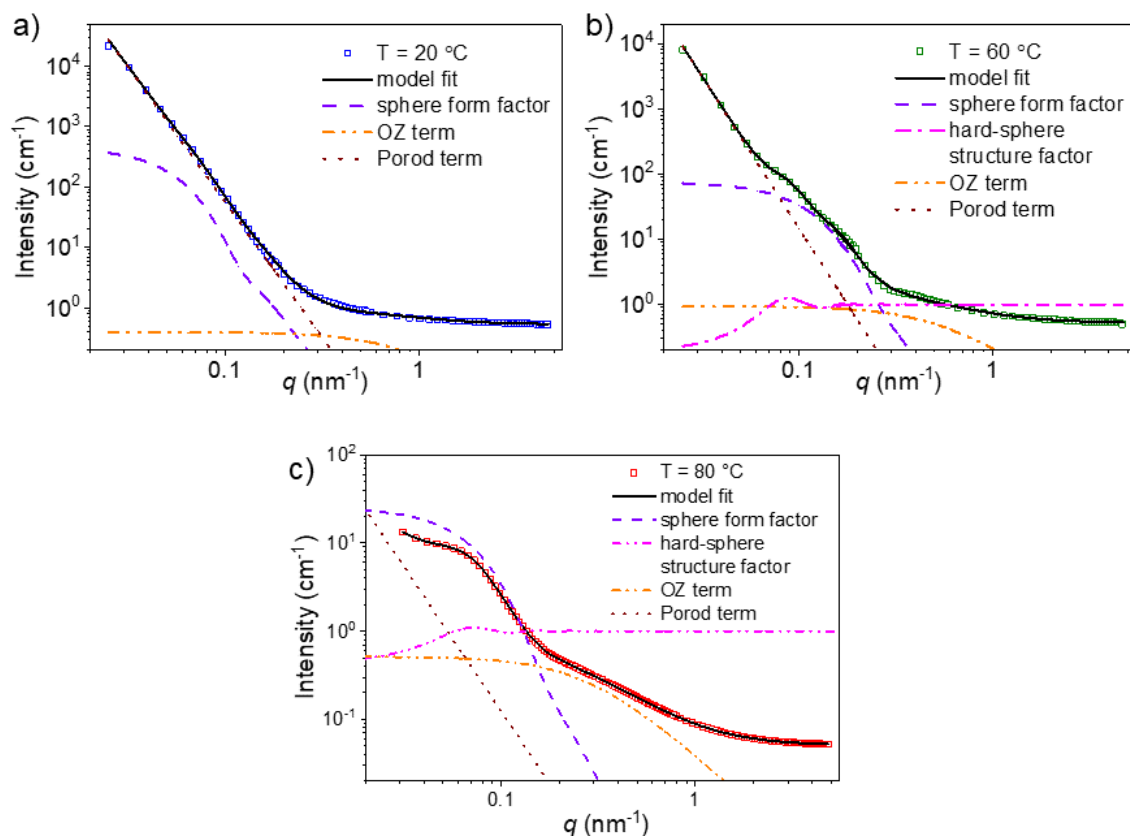

**Figure S4.** Details of model fitting to the SANS data of the 50 g L<sup>-1</sup> PSBP<sub>245</sub>-b-PNIPMAM<sub>105</sub> solution in salt-free D<sub>2</sub>O in the 3 regimes (I: 20 °C, II': 60 °C, III: 80 °C), temperatures are given in the graphs. Symbols: data points, only every second point is shown. Full lines: Fits of Eq. 1. Broken lines: Contributions to the fits as described in the legends. OZ stands for Ornstein-Zernike.

**Table S3.** Best fit parameters of Eq. 1 for the SANS data of a 50 g L<sup>-1</sup> PSBP<sub>245</sub>-*b*-PNIPMAM<sub>105</sub> solution in salt-free D<sub>2</sub>O.

|                                       | 20 °C                          | 30 °C       | 40 °C       | 50 °C       | 60 °C       | 60 °C       | 70 °C       | 80 °C       | 90 °C       |
|---------------------------------------|--------------------------------|-------------|-------------|-------------|-------------|-------------|-------------|-------------|-------------|
| $r_{avg}$ [nm]                        | 32 ± 3                         | 33 ± 3      | 42 ± 4      | 9 ± 1       | 13 ± 1      | 15 ± 1      | 19 ± 2      | 21 ± 2      | 12 ± 1      |
| $p$                                   | 0.23 ± 0.02                    | 0.23 ± 0.02 | 0.10 ± 0.01 | 0.26 ± 0.03 | 0.29 ± 0.03 | 0.25 ± 0.03 | 0.23 ± 0.03 | 0.27 ± 0.03 | 0.79 ± 0.08 |
| $R_{HS}$ [nm]                         |                                |             |             |             | 35 ± 3      | 37 ± 3      | 41 ± 4      | 41 ± 4      | 40 ± 4      |
| $\eta$                                |                                |             |             |             | 0.22 ± 0.01 | 0.20 ± 0.02 | 0.19 ± 0.01 | 0.11 ± 0.01 | 0.15 ± 0.01 |
| $I_P \times 10^8$                     | 7.1 ± 0.6                      | 6.2 ± 0.1   | 5.7 ± 0.5   | 3.2 ± 0.2   | 7.7 ± 0.7   | 14.1 ± 1.2  | 9.8 ± 0.9   | 3.5 ± 0.4   |             |
| $\alpha$                              | 4.5 ± 0.2                      | 4.5 ± 0.2   | 4.5 ± 0.1   | 4.9 ± 0.3   | 4.6 ± 0.2   | 4.5 ± 0.2   | 3.6 ± 0.2   | 3.3 ± 0.2   |             |
| $I_{oz}$ [cm <sup>-1</sup> ]          | 0.4 ± 0.1                      | 0.6 ± 0.1   | 0.8 ± 0.2   | 1.6 ± 0.3   | 0.9 ± 0.2   | 0.2 ± 0.2   | 0.3 ± 0.1   | 0.5 ± 0.1   | 0.6 ± 0.2   |
| $\xi_{oz}$ [nm]                       | 1.2 ± 0.1                      | 1.5 ± 0.1   | 1.6 ± 0.1   | 2.6 ± 0.2   | 1.9 ± 0.2   | 2.1 ± 0.2   | 2.3 ± 0.2   | 3.5 ± 0.3   | 3.2 ± 0.3   |
| $SLD_{sphere}$<br>[nm <sup>-2</sup> ] | $(7.1 \pm 0.3) \times 10^{-5}$ |             |             |             |             |             |             |             |             |

**Table S4.** Best fit parameters of Eq. 1 for the SANS data of a 50 g L<sup>-1</sup> PSBP<sub>245</sub>-*b*-PNIPMAM<sub>105</sub> solution in 24 mM NaBr in D<sub>2</sub>O.

|                                    | 20 °C                | 55 °C             |
|------------------------------------|----------------------|-------------------|
| $r_{avg}$ [nm]                     | $22.7 \pm 0.1$       | $23.92 \pm 0.05$  |
| $p$                                | $0.303 \pm 0.004$    | $0.224 \pm 0.002$ |
| $R_{HS}$ [nm]                      |                      | $31.06 \pm 0.04$  |
| $\eta$                             |                      | $0.255 \pm 0.001$ |
| $I_P \times 10^{11}$               | $4.03 \pm 0.06$      | $112.7 \pm 0.4$   |
| $\alpha$                           | $5.20 \pm 0.03$      | 4.5               |
| $I_{OZ}$ [cm <sup>-1</sup> ]       | $2.08 \pm 0.02$      |                   |
| $\xi_{OZ}$ [nm]                    | $4.7 \pm 0.3$        |                   |
| $C$ [cm <sup>-1</sup> ]            |                      | $1.26 \pm 0.01$   |
| $\xi_{solv}$ [nm]                  |                      | $4.30 \pm 0.03$   |
| $m$                                |                      | $1.91 \pm 0.01$   |
| $d_0$ [nm]                         |                      | $32.3 \pm 0.5$    |
| $SLD_{sphere}$ [nm <sup>-2</sup> ] | $7.1 \times 10^{-5}$ |                   |

**Table S5.** Best fit parameters of Eq. 2 for the SANS data of a 50 g L<sup>-1</sup> PSBP<sub>245</sub>-*b*-PNIPMAM<sub>105</sub> solution in 24 mM NaBr in D<sub>2</sub>O in regime II at 40 °C.

|                                     | <b>Regime II</b><br><b>40 °C</b> |
|-------------------------------------|----------------------------------|
| <b><i>C</i> [cm<sup>-1</sup>]</b>   | 5.38 ± 0.02                      |
| <b><math>\xi_{solv}</math> [nm]</b> | 4.78 ± 0.01                      |
| <b><i>m</i></b>                     | 2.406 ± 0.003                    |
| <b><i>d</i><sub>0</sub> [nm]</b>    |                                  |

- 
- (1) Kotlarchyk, M.; Chen, S-H. Analysis of Small Angle Neutron Scattering Spectra from Polydisperse Interacting Colloids. *J. Chem. Phys.* **1983**, *79*, 2461-2469.
- (2) Schulz, G. V. Über die Kinetik der Kettenpolymerisationen. *Z. Phys. Chem.* **1935**, *43*, 25-46.
- (3) Percus, J. K.; Yevick, G. Analysis of Classical Statistical Mechanics by Means of Collective Coordinates. *J. Phys. Rev.* **1958**, *110*, 1-13.
- (4) Porod, G. Die Röntgenkleinwinkelstreuung von dicht gepackten kolloiden Systemen. *Kolloid-Z.* **1951**, *123*, 83-114.
- (5) Koberstein, J. T.; Morra, B.; Stein, R. S. The Determination of Diffuse-Boundary Thicknesses of Polymers by Small-Angle X-ray Scattering. *J. Appl. Crystallogr.* **1980**, *13*, 34-45.
- (6) Shibayama, M.; Tanaka, T. Small Angle Neutron Scattering Study on Poly(N-isopropyl acrylamide) Gels Near their Volume-Phase Transition Temperature. *J. Chem. Phys.* **1992**, *97*, 6829-6841.

---

(7) Horkay, F.; Hammouda, B. Small-angle Neutron Scattering from Typical Synthetic and Biopolymer Solutions. *Colloid Polym. Sci.* **2008**, *286*, 611–620.

(8) Feuz, L.; Strunz, P.; Geue, T.; Textor, M.; Borisov, O. Conformation of Poly(L-lysine)-graft-poly(ethylene glycol) Molecular Brushes in Aqueous Solution Studied by Small-Angle Neutron Scattering. *Eur. Phys. J.* **2007**, *23*, 237–245.

(9) Kline, S. R. Reduction and Analysis of SANS and USANS Data Using IGOR Pro. *J. Appl. Crystallogr.* **2006**, *39*, 895.
